# Supplementary material for: Biodiversity of Lignicolous Freshwater Hyphomycetes from China and Thailand and Description of Sixteen Species
Source: MDPI journal article supplement (doi:10.3390/jof7080669), 2021-08-18
Supplement: s1 [file s1]

**Table S1.** Checklist of freshwater fungi in China from 2015–2020.

| Species                                   | Province | Year | References |
|-------------------------------------------|----------|------|------------|
| <b>JAHNULALES</b>                         |          |      |            |
| <b>Aliquandostipitaceae</b>               |          |      |            |
| <i>Ascagilis guttulaspora</i>             | Guangxi  | 2017 | [1]        |
| <i>Clohesyomyces aquaticus</i>            | Yunnan   | 2020 | [2]        |
| <i>Jahnula rostrata</i>                   | Yunnan   | 2020 | [2]        |
| <b>KIRSCHSTEINIOTHELIALES</b>             |          |      |            |
| <b>Kirschsteinioteliaceae</b>             |          |      |            |
| <i>Kirschsteiniotelia aquatica</i>        | Yunnan   | 2018 | [3]        |
| <i>Kirschsteiniotelia atra</i>            | Yunnan   | 2016 | [4]        |
| <i>Kirschsteiniotelia cangshanensis</i>   | Yunnan   | 2018 | [3]        |
| <i>Kirschsteiniotelia fluminicola</i>     | Yunnan   | 2018 | [3]        |
| <i>Kirschsteiniotelia rostrata</i>        | Yunnan   | 2018 | [3]        |
| <i>Kirschsteiniotelia submersa</i>        | Yunnan   | 2016 | [4]        |
| <b>MINUTISPHAERALES</b>                   |          |      |            |
| <b>Acrogenosporaceae</b>                  |          |      |            |
| <i>Acrogenospora aquatica</i>             | Yunnan   | 2020 | [5]        |
| <i>Acrogenospora basalicellularispora</i> | Yunnan   | 2020 | [5]        |
| <i>Acrogenospora ellipsoidea</i>          | Yunnan   | 2020 | [5]        |
| <i>Acrogenospora guttulispora</i>         | Yunnan   | 2020 | [5]        |
| <i>Acrogenospora obovoidispora</i>        | Yunnan   | 2020 | [5]        |
| <i>Acrogenospora olivaceospora</i>        | Yunnan   | 2020 | [5]        |
| <i>Acrogenospora sphaerocephala</i>       | Yunnan   | 2020 | [5]        |
| <i>Acrogenospora submersa</i>             | Yunnan   | 2020 | [5]        |
| <i>Acrogenospora subprolata</i>           | Yunnan   | 2020 | [5]        |
| <i>Acrogenospora verrucispora</i>         | Yunnan   | 2020 | [5]        |
| <i>Acrogenospora yunnanensis</i>          | Yunnan   | 2020 | [5]        |
| <b>PLEOSPORALES</b>                       |          |      |            |
| <b>Amniculicolaceae</b>                   |          |      |            |
| <i>Amniculicola aquatica</i>              | Yunnan   | 2019 | [6]        |
| <i>Amniculicola guttulata</i>             | Yunnan   | 2019 | [6]        |
| <i>Murispora aquatica</i>                 | Yunnan   | 2019 | [7]        |
| <i>Murispora cicognanii</i>               | Yunnan   | 2019 | [6]        |
| <i>Murispora fagicola</i>                 | Tibet    | 2019 | [7]        |
| <b>Bambusicolaceae</b>                    |          |      |            |
| <i>Bambusicola aquatica</i>               | Yunnan   | 2020 | [2]        |
| <b>Caryosporaceae</b>                     |          |      |            |
| <i>Caryospora aquatica</i>                | Yunnan   | 2020 | [2]        |
| <b>Corynesporascaceae</b>                 |          |      |            |
| <i>Corynespora lignicola</i>              | Yunnan   | 2020 | [8]        |
| <i>Corynespora submersa</i>               | Yunnan   | 2020 | [8]        |
| <b>Dictyosporiaceae</b>                   |          |      |            |
| <i>Aquadictyospora lignicola</i>          | Yunnan   | 2017 | [9]        |
| <i>Dictyocheirospora aquatica</i>         | Yunnan   | 2016 | [10]       |
| <i>Dictyocheirospora garethjonesii</i>    | Yunnan   | 2016 | [10]       |
| <i>Dictyocheirospora rotunda</i>          | Yunnan   | 2016 | [10]       |
| <i>Dictyocheirospora tetraploides</i>     | Yunnan   | 2018 | [11]       |
| <i>Dictyosporium muriformis</i>           | Yunnan   | 2020 | [8]        |

|                                               |         |      |      |
|-----------------------------------------------|---------|------|------|
| <i>Jalapriya pulchra</i>                      | Yunnan  | 2016 | [12] |
| <i>Pseudodictyosporium wauense</i>            | Yunnan  | 2017 | [9]  |
| <i>Vikalpa lignicola</i>                      | Yunnan  | 2016 | [12] |
| <b>Lentitheciaceae</b>                        |         |      |      |
| <i>Lentithecium cangshanense</i>              | Yunnan  | 2016 | [13] |
| <i>Lentithecium kunmingense</i>               | Yunnan  | 2020 | [2]  |
| <b>Lindgomycetaceae</b>                       |         |      |      |
| <i>Aquimassariosphaeria kunmingensis</i>      | Yunnan  | 2020 | [2]  |
| <b>Lophiostomataceae</b>                      |         |      |      |
| <i>Biappendiculispora japonica</i>            | Yunnan  | 2019 | [14] |
| <i>Flabellascoma aquaticum</i>                | Yunnan  | 2019 | [14] |
| <i>Flabellascoma fusiforme</i>                | Yunnan  | 2019 | [14] |
| <i>Neovaginatisspora fuckelii</i>             | Yunnan  | 2019 | [14] |
| <i>Pseudocapulatispora longiappendiculata</i> | Yunnan  | 2020 | [2]  |
| <i>Sigarispora clavata</i>                    | Yunnan  | 2019 | [14] |
| <b>Massarinaceae</b>                          |         |      |      |
| <i>Helminthosporium aquaticum</i>             | Yunnan  | 2016 | [15] |
| <i>Helminthosporium submersum</i>             | Yunnan  | 2018 | [16] |
| <i>Helminthosporium velutinum</i>             | Yunnan  | 2016 | [15] |
| <b>Melanommataceae</b>                        |         |      |      |
| <i>Camposporium appendiculatum</i>            | Yunnan  | 2020 | [8]  |
| <i>Camposporium appendiculatum</i>            | Yunnan  | 2020 | [8]  |
| <i>Camposporium multiseptatum</i>             | Yunnan  | 2020 | [8]  |
| <i>Camposporium multiseptatum</i>             | Yunnan  | 2020 | [8]  |
| <i>Camposporium pellucidum</i>                | Yunnan  | 2020 | [8]  |
| <i>Phragmocephala atra</i>                    | Yunnan  | 2015 | [17] |
| <i>Phragmocephala garethjonesii</i>           | Yunnan  | 2015 | [17] |
| <b>Morosphaeriaceae</b>                       |         |      |      |
| <i>Aquihelicascus yunnanensis</i>             | Yunnan  | 2020 | [2]  |
| <i>Helicascus alatus</i>                      | Yunnan  | 2018 | [18] |
| <i>Neohelicascus aquaticus</i>                | Yunnan  | 2018 | [2]  |
| <i>Neohelicascus submersus</i>                | Yunnan  | 2020 | [2]  |
| <b>Neophaeosphaeriaceae</b>                   |         |      |      |
| <i>Neophaeosphaeria phragmiticola</i>         | Yunnan  | 2018 | [19] |
| <b>Nigrogranaceae</b>                         |         |      |      |
| <i>Nigrograna cangshanensis</i>               | Yunnan  | 2017 | [20] |
| <b>Occultibambusaceae</b>                     |         |      |      |
| <i>Occultibambusa kunmingensis</i>            | Yunnan  | 2020 | [2]  |
| <i>Occultibambusa pustula</i>                 | Yunnan  | 2020 | [2]  |
| <i>Seriascoma didymosporum</i>                | Yunnan  | 2020 | [2]  |
| <b>Periconiaceae</b>                          |         |      |      |
| <i>Periconia aquatica</i>                     | Yunnan  | 2017 | [21] |
| <i>Periconia cookei</i>                       | Yunnan  | 2018 | [19] |
| <i>Periconia minutissima</i>                  | Yunnan  | 2017 | [21] |
| <i>Periconia pseudobyssoides</i>              | Yunnan  | 2018 | [19] |
| <i>Periconia submersa</i>                     | Yunnan  | 2017 | [21] |
| <b>Phaeoseptaceae</b>                         |         |      |      |
| <i>Pleopunctum ellipsoideum</i>               | Guizhou | 2019 | [68] |
| <i>Pleopunctum pseudoellipsoideum</i>         | Guizhou | 2019 | [68] |
| <b>Pleosporaceae</b>                          |         |      |      |
| <i>Curvularia eragrostidis</i>                | Yunnan  | 2015 | [17] |

|                                      |         |      |      |
|--------------------------------------|---------|------|------|
| <i>Curvularia verruculosa</i>        | Yunnan  | 2015 | [17] |
| <b>Roussoellaceae</b>                |         |      |      |
| <i>Neorousoella bambusae</i>         | Yunnan  | 2020 | [2]  |
| <i>Neorousoella leucaenae</i>        | Yunnan  | 2020 | [2]  |
| <i>Roussoella aquatica</i>           | Yunnan  | 2020 | [2]  |
| <b>Tetraplospheariaceae</b>          |         |      |      |
| <i>Tetraploa aquatica</i>            | Guizhou | 2020 | [23] |
| <i>Tetraploa puzheheiensis</i>       | Yunnan  | 2020 | [2]  |
| <i>Tetraploa yunnanensis</i>         | Yunnan  | 2020 | [2]  |
| <b>Torulaceae</b>                    |         |      |      |
| <i>Dendryphion aquaticum</i>         | Yunnan  | 2016 | [4]  |
| <i>Dendryphion fluminicola</i>       | Yunnan  | 2018 | [24] |
| <i>Dendryphion nanum</i>             | Yunnan  | 2016 | [4]  |
| <i>Dendryphion submersum</i>         | Yunnan  | 2016 | [4]  |
| <i>Neotorula aquatica</i>            | Yunnan  | 2016 | [4]  |
| <i>Neotorula submersa</i>            | Yunnan  | 2016 | [25] |
| <i>Rostriconidium aquaticum</i>      | Yunnan  | 2018 | [24] |
| <i>Torula aquatica</i>               | Yunnan  | 2018 | [24] |
| <i>Torula fici</i>                   | Yunnan  | 2018 | [24] |
| <i>Torula ficus</i>                  | Yunnan  | 2018 | [4]  |
| <i>Torula gaodangensis</i>           | Guizhou | 2017 | [21] |
| <i>Torula masonii</i>                | Yunnan  | 2018 | [24] |
| <b>TUBEUFIALES</b>                   |         |      |      |
| <b>Tubeufiaceae</b>                  |         |      |      |
| <i>Berkleasium aquaticum</i>         | Guangxi | 2017 | [26] |
| <i>Berkleasium guangxiense</i>       | Guangxi | 2017 | [26] |
| <i>Dematioheliconia perelegans</i>   | Hainan  | 2018 | [27] |
| <i>Heliconia multiseptatum</i>       | Guangxi | 2018 | [27] |
| <i>Helicomycetes chiayiensis</i>     | Taiwan  | 2018 | [28] |
| <i>Helicomycetes hyalosporus</i>     | Guangxi | 2018 | [27] |
| <i>Helicomycetes roseus</i>          | Yunnan  | 2017 | [29] |
| <i>Muripulchra aquatica</i>          | Yunnan  | 2017 | [29] |
| <i>Neohelicomyces aquaticus</i>      | Yunnan  | 2017 | [29] |
| <i>Neohelicomyces dehongensis</i>    | Yunnan  | 2020 | [2]  |
| <i>Neohelicomyces grandisporus</i>   | Yunnan  | 2017 | [29] |
| <i>Neohelicomyces hyalosporus</i>    | Guangxi | 2018 | [27] |
| <i>Neohelicomyces submersus</i>      | Yunnan  | 2017 | [29] |
| <i>Neohelicosporium aquaticum</i>    | Guangxi | 2018 | [30] |
| <i>Neohelicosporium guangxiense</i>  | Guangxi | 2017 | [30] |
| <i>Neohelicosporium hyalosporum</i>  | Guangxi | 2018 | [30] |
| <i>Neohelicosporium parvisporum</i>  | Guangxi | 2018 | [30] |
| <i>Neohelicosporium taiwanense</i>   | Taiwan  | 2018 | [28] |
| <i>Pseudohelicomyces hyalosporus</i> | Yunnan  | 2018 | [27] |
| <i>Pseudoheliconia subglobosum</i>   | Taiwan  | 2018 | [31] |
| <i>Tubeufia aquatica</i>             | Yunnan  | 2017 | [29] |
| <i>Tubeufia cylindrothecia</i>       | Yunnan  | 2017 | [29] |
| <i>Tubeufia eccentrica</i>           | Guangxi | 2018 | [27] |
| <i>Tubeufia fangchengensi</i>        | Guangxi | 2018 | [27] |
| <i>Tubeufia geniculata</i>           | Taiwan  | 2018 | [32] |
| <i>Tubeufia guangxiensis</i>         | Guangxi | 2017 | [33] |
| <i>Tubeufia hechiensis</i>           | Guangxi | 2018 | [27] |

|                                     |         |      |      |
|-------------------------------------|---------|------|------|
| <i>Tubeufia inaequalis</i>          | Guangxi | 2018 | [27] |
| <i>Tubeufia machaerinae</i>         | Guangxi | 2018 | [27] |
| <i>Tubeufia rubra</i>               | Guangxi | 2018 | [27] |
| <i>Tubeufia sympodihylospora</i>    | Guangxi | 2018 | [27] |
| <i>Tubeufia taiwanensis</i>         | Taiwan  | 2018 | [27] |
| <i>Tubeufia xylophila</i>           | Guangxi | 2018 | [27] |
| <b>EUROTIOMYCETES</b>               |         |      |      |
| <b>CHAETOTHYRIALES</b>              |         |      |      |
| <b>Herpotrichiellaceae</b>          |         |      |      |
| <i>Minimelanolocus aquaticus</i>    | Yunnan  | 2015 | [34] |
| <i>Minimelanolocus asiaticus</i>    | Yunnan  | 2015 | [34] |
| <i>Minimelanolocus curvatus</i>     | Yunnan  | 2015 | [34] |
| <i>Minimelanolocus melanicus</i>    | Yunnan  | 2015 | [34] |
| <i>Minimelanolocus obscuru</i>      | Yunnan  | 2015 | [34] |
| <i>Minimelanolocus yunnanensis</i>  | Yunnan  | 2016 | [35] |
| <b>SORDARIOMYCETES</b>              |         |      |      |
| <b>AMPHISPHAERIALES</b>             |         |      |      |
| <b>Apiosporaceae</b>                |         |      |      |
| <i>Arthrinium aquaticum</i>         | Yunnan  | 2019 | [36] |
| <b>Sporocadaceae</b>                |         |      |      |
| <i>Seiridium aquaticum</i>          | Yunnan  | 2019 | [36] |
| <b>TRACTOSPORALES</b>               |         |      |      |
| <b>Atractosporaceae</b>             |         |      |      |
| <i>Atractospora aquatica</i>        | Yunnan  | 2019 | [36] |
| <b>BARBATOSPHAERIALES</b>           |         |      |      |
| <b>Barbatosphaeriaceae</b>          |         |      |      |
| <i>Barbatosphaeria lignicola</i>    | Yunnan  | 2019 | [36] |
| <b>CHAETOSPHAERIALES</b>            |         |      |      |
| <b>Chaetosphaeriaceae</b>           |         |      |      |
| <i>Brunneodinemasporium jonesii</i> | Guangxi | 2016 | [37] |
| <i>Chaetosphaeria aquatica</i>      | Yunnan  | 2019 | [36] |
| <i>Chaetosphaeria catenulata</i>    | Yunnan  | 2019 | [36] |
| <i>Chaetosphaeria cubensis</i>      | Yunnan  | 2019 | [36] |
| <i>Chaetosphaeria guttulata</i>     | Yunnan  | 2019 | [36] |
| <i>Chaetosphaeria myriocarpa</i>    | Yunnan  | 2019 | [36] |
| <i>Chaetosphaeria submersa</i>      | Yunnan  | 2019 | [36] |
| <i>Chloridium gonytrichii</i>       | Yunnan  | 2019 | [36] |
| <i>Codinaea yunnanensis</i>         | Yunnan  | 2019 | [36] |
| <i>Dictyochaeta cangshanensis</i>   | Yunnan  | 2019 | [36] |
| <i>Dictyochaeta ellipsoidea</i>     | Yunnan  | 2019 | [36] |
| <i>Dictyochaeta lignicola</i>       | Yunnan  | 2019 | [36] |
| <i>Dictyochaeta submersa</i>        | Yunnan  | 2019 | [36] |
| <i>Nawawia oviformis</i>            | Sichuan | 2016 | [37] |
| <i>Sporoschisma aquaticum</i>       | Yunnan  | 2016 | [39] |
| <i>Sporoschisma hemipsila</i>       | Yunnan  | 2016 | [39] |
| <i>Sporoschisma juvenile</i>        | Yunnan  | 2019 | [36] |
| <i>Sporoschisma mirabile</i>        | Yunnan  | 2016 | [39] |
| <i>Sporoschisma nigroseptatum</i>   | Yunnan  | 2016 | [39] |
| <i>Sporoschisma phaeocentri</i>     | Yunnan  | 2016 | [39] |
| <i>Sporoschisma taitense</i>        | Yunnan  | 2016 | [39] |
| <i>Tainosphaeria jonesii</i>        | Guangxi | 2016 | [37] |

|                                                   |          |      |      |
|---------------------------------------------------|----------|------|------|
| <i>Tainosphaeria lunata</i>                       | Yunnan   | 2019 | [36] |
| <b>CONIOCHAETALES</b>                             |          |      |      |
| <b>Cordanaceae</b>                                |          |      |      |
| <i>Cordana aquatica</i>                           | Yunnan   | 2019 | [36] |
| <i>Cordana lignicola</i>                          | Yunnan   | 2019 | [36] |
| <i>Cordana terrestris</i>                         | Yunnan   | 2019 | [36] |
| <b>CONIOSCYPHALES</b>                             |          |      |      |
| <b>Conioscyphaceae</b>                            |          |      |      |
| <i>Conioscypha verrucosa</i>                      | Guizhou  | 2020 | [8]  |
| <i>Conioscypha aquatica</i>                       | Yunnan   | 2019 | [36] |
| <i>Conioscypha submersa</i>                       | Yunnan   | 2019 | [36] |
| <b>DIAPORTHOMYCETIDAE families incertae sedis</b> |          |      |      |
| <b>Acrodityaceae</b>                              |          |      |      |
| <i>Acroditya fluminicola</i>                      |          |      |      |
| <b>Junewangiaceae</b>                             |          |      |      |
| <i>Dictyospora hydei</i>                          | Yunnan   | 2018 | [40] |
| <i>Junewangia aquatica</i>                        | Yunnan   | 2018 | [41] |
| <i>Sporidesmiella aquatica</i>                    | Yunnan   | 2019 | [36] |
| <i>Sporidesmiella hyalosperma</i>                 | Yunnan   | 2019 | [36] |
| <i>Sporidesmiella novae-zelandiae</i>             | Yunnan   | 2019 | [36] |
| <i>Wongia aquatica</i>                            | Yunnan   | 2019 | [36] |
| <b>Pseudostanjehughesiaceae</b>                   |          |      |      |
| <i>Pseudostanjehughesia lignicola</i>             | Yunnan   | 2019 | [36] |
| <b>Rhamphoriaceae</b>                             |          |      |      |
| <i>Rhodoveronaea aquatica</i>                     | Yunnan   | 2019 | [36] |
| <b>DISTOSEPTISPORALES</b>                         |          |      |      |
| <b>Aquapteridosporaceae</b>                       |          |      |      |
| <i>Aquapteridospora fusiformis</i>                | Yunnan   | 2019 | [36] |
| <b>Distoseptisporaceae</b>                        |          |      |      |
| <i>Distoseptispora aquatica</i>                   | Yunnan   | 2016 | [4]  |
| <i>Distoseptispora cangshanensis</i>              | Yunnan   | 2018 | [42] |
| <i>Distoseptispora fluminicola</i>                | Yunnan   | 2016 | [4]  |
| <i>Distoseptispora obpyriformis</i>               | Yunnan   | 2018 | [42] |
| <i>Distoseptispora rostrata</i>                   | Yunnan   | 2018 | [42] |
| <i>Distoseptispora submersa</i>                   | Yunnan   | 2018 | [42] |
| <i>Distoseptispora suoluensis</i>                 | Guizhou  | 2018 | [43] |
| <b>GLOMERELLALES</b>                              |          |      |      |
| <b>Reticulascaceae</b>                            |          |      |      |
| <i>Cylindrotrichum clavatum</i>                   | Yunnan   | 2018 | [44] |
| <i>Cylindrotrichum gorii</i>                      | Yunnan   | 2018 | [44] |
| <i>Cylindrotrichum submersum</i>                  | Yunnan   | 2019 | [36] |
| <i>Kylindria aquatica</i>                         | Yunnan   | 2018 | [44] |
| <i>Kylindria chinensis</i>                        | Yunnan   | 2018 | [44] |
| <b>HYPOCREALES</b>                                |          |      |      |
| <b>Nectriaceae</b>                                |          |      |      |
| <i>Aquanectria jacinthicolor</i>                  | Yunnan   | 2018 | [45] |
| <i>Aquanectria penicillioides</i>                 | Yunnan   | 2019 | [36] |
| <i>Chaetopsina beijingensis</i>                   | Yunnan   | 2019 | [36] |
| <i>Cosmospora aquatica</i>                        | Yunnan   | 2019 | [36] |
| <i>Cosmospora olivacea</i>                        | Xinjiang | 2018 | [45] |
| <i>Fusicolla aqueductum</i>                       | Xinjiang | 2018 | [45] |

|                                                 |         |      |      |
|-------------------------------------------------|---------|------|------|
| <i>Mariannaea chlamydospora</i>                 | Hubei   | 2017 | [46] |
| <i>Mariannaea cinerea</i>                       | Yunnan  | 2017 | [46] |
| <i>Mariannaea fusiformis</i>                    | Hubei   | 2017 | [46] |
| <i>Mariannaea fusiformis</i>                    | Hubei   | 2017 | [46] |
| <i>Mariannaea lignicola</i>                     | Jiangxi | 2017 | [46] |
| <i>Mariannaea samuelsii</i>                     | Yunnan  | 2019 | [36] |
| <i>Mariannaea superimposita</i>                 | Yunnan  | 2019 | [36] |
| <i>Paracremonium binnewijzendii</i>             | Yunnan  | 2019 | [36] |
| <i>Stachybotrys chartarum</i>                   | Yunnan  | 2019 | [36] |
| <i>Stachybotrys chlorohalonata</i>              | Yunnan  | 2019 | [36] |
| <b>SORDARIOMYCETES <i>incertae sedis</i></b>    |         |      |      |
| <i>Pseudoconlarium punctiforme</i>              | Guizhou | 2020 | [8]  |
| <b>Ceratosphaeriaceae</b>                       |         |      |      |
| <i>Ceratosphaeria aquatica</i>                  | Yunnan  | 2019 | [36] |
| <b>Magnaporthaceae</b>                          |         |      |      |
| <i>Aquafiliformis lignicola</i>                 | Yunnan  | 2019 | [36] |
| <b>MYRMECRIDIALES</b>                           |         |      |      |
| <b>Myrmecridiaceae</b>                          |         |      |      |
| <i>Myrmecridium aquaticum</i>                   | Yunnan  | 2019 | [36] |
| <i>Neomyrmecridium guizhouense</i>              | Guizhou | 2020 | [8]  |
| <b>PLEUROTHECIALES</b>                          |         |      |      |
| <b>Pleurotheciaceae</b>                         |         |      |      |
| <i>Pleurothecium pulneyense</i>                 | Yunnan  | 2018 | [47] |
| <i>Pleurothecium recurvatum</i>                 | Yunnan  | 2018 | [47] |
| <i>Phaeoisaria clematidis</i>                   | Yunnan  | 2018 | [47] |
| <i>Phaeoisaria guttulata</i>                    | Guizhou | 2018 | [47] |
| <i>Pleurotheciella uniseptata</i>               | Yunnan  | 2018 | [47] |
| <i>Sterigmatobotrys uniseptata</i>              | Yunnan  | 2019 | [36] |
| <i>Phaeoisaria aquatica</i>                     | Yunnan  | 2018 | [47] |
| <i>Pleurotheciella aquatica</i>                 | Yunnan  | 2018 | [47] |
| <i>Pleurotheciella fusiformis</i>               | Yunnan  | 2018 | [47] |
| <i>Pleurotheciella guttulata</i>                | Yunnan  | 2018 | [47] |
| <i>Pleurotheciella lunata</i>                   | Yunnan  | 2018 | [47] |
| <i>Pleurotheciella saprophytica</i>             | Yunnan  | 2018 | [47] |
| <i>Pleurotheciella submersa</i>                 | Yunnan  | 2018 | [47] |
| <i>Pleurothecium aquaticum</i>                  | Yunnan  | 2018 | [47] |
| <b>PSEUDODACTYLARIALES</b>                      |         |      |      |
| <b>Pseudodactylariaceae</b>                     |         |      |      |
| <i>Pseudodactylaria fusiformis</i>              | Guizhou | 2020 | [48] |
| <b>Savoryellales</b>                            |         |      |      |
| <b>Savoryellaceae</b>                           |         |      |      |
| <i>Dematiosporium aquaticum</i>                 | Yunnan  | 2018 | [36] |
| <b>SORDARIALES</b>                              |         |      |      |
| <b>Chaetomiaceae</b>                            |         |      |      |
| <i>Chaetomium globosum</i>                      | Yunnan  | 2019 | [36] |
| <b>Lasiosphaeriaceae</b>                        |         |      |      |
| <i>Apiosordaria hamata</i>                      | Hubei   | 2016 | [49] |
| <i>Cercophora caudata</i>                       | Yunnan  | 2019 | [36] |
| <b>SORDARIALES genera <i>incertae sedis</i></b> |         |      |      |
| <i>Cuspidatispora xiphiago</i>                  | Yunnan  | 2019 | [36] |
| <b>SPORIDESMIALES</b>                           |         |      |      |

|                                         |         |      |      |
|-----------------------------------------|---------|------|------|
| <i>Sporidesmium cangshanense</i>        | Yunnan  | 2016 | [4]  |
| <i>Sporidesmium fluminicola</i>         | Yunnan  | 2016 | [4]  |
| <i>Sporidesmium submersum</i>           | Yunnan  | 2016 | [4]  |
| <i>Sporidesmium dulongense</i>          | Yunnan  | 2020 | [6]  |
| <i>Sporidesmium guizhouense</i>         | Yunnan  | 2018 | [50] |
| <i>Sporidesmium lageniforme</i>         | Yunnan  | 2019 | [36] |
| <i>Sporidesmium lignicola</i>           | Yunnan  | 2019 | [36] |
| <b>TOGNINIALES</b>                      |         |      |      |
| <b>Togniniaceae</b>                     |         |      |      |
| <i>Phaeoacremonium ovale</i>            | Yunnan  | 2018 | [51] |
| <b>XENOSPADICOIDALES</b>                |         |      |      |
| <b>Xenospadicoidaceae</b>               |         |      |      |
| <i>Neospadicoides aquatica</i>          | Yunnan  | 2019 | [36] |
| <i>Neospadicoides lignicola</i>         | Yunnan  | 2019 | [36] |
| <i>Neospadicoides yunnanensis</i>       | Yunnan  | 2019 | [36] |
| <i>Neospadicoides yunnanensis</i>       | Yunnan  | 2019 | [36] |
| <b>XYLARIALES</b>                       |         |      |      |
| <b>Hypoxylaceae</b>                     |         |      |      |
| <i>Hypoxylon lignicola</i>              | Yunnan  | 2019 | [36] |
| <b>ASCOMYCOTA <i>incertae sedis</i></b> |         |      |      |
| <i>Phaeomonilia aquatica</i>            | Jiangxi | 2018 | [52] |
| <i>Xylohyphopsis aquatica</i>           | Jiangxi | 2016 | [53] |

## References

- Hyde, K.D.; Norphanphoun, C.; Abreu, V.P.; Bazzicalupo, A.; Chethana, K.W.T.; Clericuzio, M.; Dayarathne, M.C.; Dissanayake, A.J.; Ekanayaka, A.H.; He, M.Q.; et al. Fungal diversity notes 603–708: Taxonomic and phylogenetic notes on genera and species. *Fungal Divers.* **2017**, *87*, 1–235, doi:10.1007/s13225-017-0391-3.
- Dong, W.; Wang, B.; Hyde, K.D.; McKenzie, E.H.C.; Bhat, D.J.; Raja, H.A.; Tanaka, K.; Abdel-Wahab, M.A.; Abdel-Aziz, F.A.; Doilom, M.; et al. Freshwater Dothideomycetes. *Fungal Divers.* **2020**, *105*, 319–575, doi:10.1007/s13225-020-00463-5.
- Bao, D.F.; Luo, Z.L.; Liu, J.K.; Bhat, D.J.; Sarunya, N.; Li, W.L.; Su, H.Y.; Hyde, K.D. Lignicolous freshwater fungi in China III: New species and record of *Kirschsteiniotelia* from northwestern Yunnan Province. *Mycosphere* **2018**, *9*, 755–768, doi:10.5943/mycosphere/9/4/4.
- Su, H.Y.; Hyde, K.D.; Maharachchikumbura, S.S.N.; Ariyawansa, H.A.; Luo, Z.L.; Promputtha, I.; Tian, Q.; Lin, C.G.; Shang, Q.J.; Zhao, Y.C.; et al. The families Distoseptisporaceae fam. nov., Kirschsteinioteliaceae, Sporormiaceae and Torulaceae, with new species from freshwater in Yunnan Province, China. *Fungal Divers.* **2016**, *80*, 375–409, doi:10.1007/s13225-016-0362-0.
- Bao, D.F.; McKenzie, E.H.C.; Bhat, D.J.; Hyde, K.D.; Luo, Z.L.; Shen, H.W.; Su, H.Y. *Acrogenospora* (Acrogenosporaceae, Minutisphaerales) appears to be a very diverse genus. *Front. Microbiol.* **2020**, *11*, doi:10.3389/fmicb.2020.01606.
- Hyde, K.D.; Tennakoon, D.S.; Jeewon, R.; Bhat, D.J.; Maharachchikumbura, S.S.N.; Rossi, W.; Leonardi, M.; Lee, H.M.; Mun, H.Y.; Houbraken, J.; et al. Fungal diversity notes 1036–1150: Taxonomic and phylogenetic contributions on genera and species of fungal taxa. *Fungal Divers.* **2019**, *96*, 1–242, doi:10.1007/s13225-019-00429-2.
- Bao, D.F.; Wanasinghe, D.N.; Luo, Z.L.; Mortimer, P.E.; Kumar, V.; Su, H.Y.; Hyde, K.D. *Murispora aquatica* sp. nov. and *Murispora fagicola*, a new record from freshwater habitat in China. *Phytotaxa* **2019**, *416*, 1–13, doi:10.11646/phytotaxa.416.1.1.
- Hyde, K.D.; Dong, Y.; Phookamsak, R.; Jeewon, R.; Bhat, D.J.; Jones, E.B.G.; Liu, N.G.; Abeywickrama, P.D.; Mapook, A.; Wei, D.P.; et al. Fungal diversity notes 1151–1276: Taxonomic and phylogenetic contributions on genera and species of fungal taxa. *Fungal Divers.* **2020**, *100*, 5–277, doi:10.1007/s13225-020-00439-5.
- Li, W.L.; Luo, Z.L.; Liu, J.K.; Bhat, D.J.; Bao, D.F.; Su, H.Y.; Hyde, K.D. Lignicolous freshwater fungi from China I: *Aquadictyospora lignicola* gen. et sp. nov. and new record of *Pseudodictyosporium wauense* from northwestern Yunnan Province. *Mycosphere* **2017**, *8*, 1587–1597, doi:10.5943/mycosphere/8/10/1.

10. Wang, R.X.; Luo, Z.L.; Hyde, K.D.; Bhat, D.J.; Su, X.J.; Su, H.Y. New species and records of *Dictyocheiropora* from submerged wood in north-western Yunnan, China. *Mycosphere* **2016**, *7*, 1357–1367, doi:10.5943/mycosphere/7/9/9.
11. Yang, J.; Liu, J.K.; Hyde, K.D.; Jones, E.B.G.; Liu, Z.Y. New species in *Dictyosporium*, new combinations in *Dictyocheiropora* and an updated backbone tree for Dictyosporiaceae. *Mycosphaerella* **2018**, *36*, 83–105, doi:10.3897/mycokeys.36.27051.
12. Boonmee, S.; D'souza, M.J.; Luo, Z.L.; Pinruan, U.; Tanaka, K.; Su, H.Y.; Bhat, D.J.; McKenzie, E.H.C.; Jones, E.B.G.; Taylor, J.E.; et al. Dictyosporiaceae fam. nov. *Fungal Divers.* **2016**, *80*, 457–482, doi:10.1007/s13225-016-0363-z.
13. Su, H.Y.; Luo, Z.L.; Liu, X.Y.; Su, X.J.; Hu, D.M.; Zhou, D.Q.; Bahkali, A.H.; Hyde, K.D. *Lentithecium cangshanense* sp. nov. (Lentitheciaceae) from freshwater habitats in Yunnan Province, China. *Phytotaxa* **2016**, *267*, 61–69, doi:10.11646/phytotaxa.267.1.6.
14. Bao, D.F.; Su, H.Y.; Maharachchikumbura, S.S.N.; Liu, J.K.; Nalumpang, S.; Luo, Z.L.; Hyde, K.D. Lignicolous freshwater fungi from China and Thailand: Multi-gene phylogeny reveals new species and new records in Lophiostomataceae. *Mycosphere* **2019**, *10*, 1080–1099, doi:10.5943/mycosphere/10/1/20.
15. Zhu, D.; Luo, Z.L.; Baht, D.J.; McKenzie, E.H.C.; Bahkali, A.H.; Zhou, D.Q.; Su, H.Y.; Hyde, K.D. *Helminthosporium velutinum* and *H. aquaticum* sp. nov. from aquatic habitats in Yunnan Province, China. *Phytotaxa* **2016**, *253*, 179–190, doi:10.11646/phytotaxa.253.1.6.
16. Zhao, N.; Luo, Z.L.; Bhat, D.J.; Liu, J.K.; Bao, D.F.; Hao, Y.E.; Su, H.Y.; Hyde, K.D. *Helminthosporium submersum* sp. nov. (Massariaceae) from submerged wood in north-western Yunnan Province, China. *Phytotaxa* **2018**, *348*, 269–278, doi:10.11646/phytotaxa.348.4.3.
17. Su, H.Y.; Udayanga, D.; Luo, Z.L.; Manamgoda, D.S.; Zhao, Y.C.; Yang, J.; Liu, X.Y.; McKenzie, E.H.C.; Zhou, D.Q.; Hyde, K.D. Hyphomycetes from aquatic habitats in Southern China: Species of *Curvularia* (Pleosporaceae) and *Phragmocephala* (Melanconiaceae). *Phytotaxa* **2015**, *226*, 201–4216, doi:10.11646/phytotaxa.226.3.1.
18. Zeng, M.; Huang, S.K.; Hyde, K.D.; Zhao, Q. *Helicascus alatus* (Morosphaeriaceae), a new freshwater species from southwestern China. *Phytotaxa* **2018**, *351*, 210–218, doi:10.11646/phytotaxa.351.3.2.
19. Hyde, K.D.; Chaiwan, N.; Norphanphoun, C.; Boonmee, S.; Camporesi, E.; Chethana, K.W.T.; Dayarathne, M.C.; de Silva, N.I.; Dissanayake, A.J.; Ekanayaka, A.H.; et al. Mycosphere notes 169–224. *Mycosphere* **2018**, *9*, 271–430, doi:10.5943/mycosphere/9/2/8.
20. Tibpromma, S.; Hyde, K.D.; Jeewon, R.; Maharachchikumbura, S.S.N.; Liu, J.K.; Bhat, D.J.; Phillips, A.J.L.; Wanasinghe, D.N.; Samarakoon, M.C.; Jayawardena, R.S.; et al. Fungal diversity notes 491–602: Taxonomic and phylogenetic contributions to fungal taxa. *Fungal Divers.* **2017**, *83*, 1–261, doi:10.1007/s13225-017-0378-0.
21. Hyde, K.D.; Norphanphoun, C.; Abreu, V.P.; Bazzicalupo, A.; Chethana, K.W.T.; Clericuzio, M.; Dayarathne, M.C.; Dissanayake, A.J.; Ekanayaka, A.H.; He, M.Q.; et al. Fungal diversity notes 603–708: Taxonomic and phylogenetic notes on genera and species. *Fungal Divers.* **2017**, *87*, 1–235, doi:10.1007/s13225-017-0391-3.
22. Liu, N.G.; Hyde, K.D.; Bhat, D.J.; Jumpathong, J.; Liu, J.K. Morphological and phylogenetic studies of *Pleopunctum* gen. nov. (Phaeosphaeriaceae, Pleosporales) from China. *Mycosphere* **2019**, *10*, 757–775, doi:10.5943/mycosphere/10/1/17.
23. Li, W.L.; Bao, D.F.; Bhat, D.J.; Su, H.Y. *Tetraploa aquatica* (Tetraplosporaaceae), a new freshwater fungal species from Yunnan Province, China. *Phytotaxa* **2020**, *459*, 181–189, doi:10.11646/phytotaxa.459.2.8.
24. Su, X.J.; Luo, Z.L.; Jeewon, R.; Bhat, D.J.; Bao, D.F.; Li, W.L.; Hao, Y.E.; Su, H.Y.; Hyde, K.D. Morphology and multigene phylogeny reveal new genus and species of Torulaceae from freshwater habitats in northwestern Yunnan, China. *Mycol. Prog.* **2018**, *17*, 531–545.
25. Hyde, K.D.; Hongsanan, S.; Jeewon, R.; Bhat, D.J.; McKenzie, E.H.C.; Jones, E.B.G.; Phookamsak, R.; Ariyawansa, H.A.; Boonmee, S.; Zhao, Q.; et al. Fungal diversity notes 367–490: Taxonomic and phylogenetic contributions to fungal taxa. *Fungal Divers.* **2016**, *80*, 1–270, doi:10.1007/s13225-016-0373-x.
26. Lu, Y.Z.; Boonmee, S.; Liu, J.K.; Hyde, K.D.; Bhat, D.J.; Eungwanichayapant, P.D.; Kang, J.C. Novel *Neocanthostigma* species from aquatic habitats. *Cryptogam. Mycol.* **2017**, *38*, 169–190, doi:10.7872/crym/v38.iss2.2017.169.
27. Lu, Y.Z.; Liu, J.K.; Hyde, K.D.; Jeewon, R.; Kang, J.C.; Fan, C.; Boonmee, S.; Bhat, D.J.; Luo, Z.L.; Lin, C.G.; et al. A taxonomic reassessment of Tubeufiales based on multi-locus phylogeny and morphology. *Fungal Divers.* **2018**, *92*, 131–344, doi:10.1007/s13225-018-0411-y.
28. Kuo, C.H.; Goh, T.K. Two new species of helicosporous hyphomycetes from Taiwan. *Mycol. Prog.* **2018**, *17*, 557–569, doi:10.1007/s11557-018-1384-7.

29. Luo, Z.L.; Bhat, D.J.; Jeewon, R.; Boonmee, S.; Bao, D.F.; Zhao, Y.C.; Chai, H.M.; Su, H.Y.; Su, X.J.; Hyde, K.D. Molecular phylogeny and morphological characterization of asexual fungi (Tubeufiaceae) from freshwater habitats in Yunnan, China. *Cryptogam. Mycol.* **2017**, *38*, 27–53, doi:10.7872/crym/v38.iss1.2017.27.
30. Lu, Y.Z.; Boonmee, S.; Liu, J.K.; Hyde, K.D.; McKenzie, E.H.C.; Eungwanichayapant, P.D.; Kang, J.C. Multi-gene phylogenetic analyses reveals *Neohelicosporium* gen. nov. and five new species of helicosporous hyphomycetes from aquatic habitats. *Mycol. Prog.* **2018**, *17*, 631–646, doi:10.1007/s11557-017-1366-1.
31. Goh, T.K.; Kuo, C.H. A new species of *Helicoön* from Taiwan. *Phytotaxa* **2018**, *346*, 141–156, doi:10.11646/phytotaxa.346.2.2.
32. Kuo, C.H.; Goh, T.K. A new species and a new record of *Helicomycetes* from Taiwan. *Mycoscience* **2018**, *59*, 433–440, doi:10.1016/j.myc.2018.04.002.
33. Chaiwan, N.; Lu, Y.Z.; Tibpromma, S.; Bhat, D.J.; Hyde, K.D.; Boonmee, S. *Neotubeufia* gen. nov. and *Tubeufia guangxiensis* sp. nov. (Tubeufiaceae) from freshwater habitats. *Mycosphere* **2017**, *8*, 1443–1456, doi:10.5943/mycosphere/8/9/9.
34. Liu, X.Y.; Udayanga, D.; Luo, Z.L.; Chen, L.J.; Zhou, D.Q.; Su, H.Y.; Hyde, K.D. Backbone tree for Chaetothyriales with four new species of *Minimelanolocus* from aquatic habitats. *Fungal Biol.* **2015**, *119*, 1046–1062, doi:10.1016/j.funbio.2015.08.005.
35. Tian, Q.; Doilom, M.; Luo, Z.L.; Chomnunti, P.; Bhat, D.J.; Xu, J.C.; Hyde, K.D. Introducing *Melanoctona tectonae* gen. et sp. nov. and *Minimelanolocus yunnanensis* sp. nov. (Herpotrichiellaceae, Chaetothyriales). *Cryptogam. Mycol.* **2016**, *37*, 477–492, doi:10.11646/phytotaxa.226.3.1.
36. Luo, Z.L.; Hyde, K.D.; Liu, J.K.; Maharachchikumbura, S.S.N.; Jeewon, R.; Bao, D.F.; Bhat, D.J.; Lin, C.G.; Li, W.L.; Yang, J.; et al. Freshwater Sordariomycetes. *Fungal Divers.* **2019**, *99*, 451–660, doi:10.1007/s13225-019-00438-1.
37. Lu, Y.Z.; Liu, J.K.; Hyde, K.D.; Bhat, D.J.; Xiao, Y.P.; Tian, Q.; Wen, T.C.; Boonmee, S.; Kang, J.C. *Brunneodinemaspodium jonesii* and *Tainosphaeria jonesii* spp. nov. (Chaetosphaeriaceae, Chaetosphaeriales) from southern China. *Mycosphere* **2016**, *7*, 1323–1332, doi:10.5943/mycosphere/7/9/6.
38. Peng, J.; Chang, D.; Huang, Y.; Yu, Z.F. *Nawawia oviformis* sp. nov. from China. *Mycotaxon* **2016**, *131*, 735–738, doi:10.5248/131.735.
39. Luo, Z.L.; Bao, D.F.; Bhat, D.J.; Yang, J.; Chai, H.M.; Li, S.H.; Bahkali, A.H.; Su, H.Y.; Hyde, K.D. *Sporoschisma* from submerged wood in Yunnan, China. *Mycol. Prog.* **2016**, *15*, 1145–1155, doi:10.1007/s11557-016-1236-2.
40. Song, H.Y.; Huo, G.H.; Hu, D.M. *Dictyosporella hydei* sp. nov., an asexual species from freshwater habitats in China. *Phytotaxa* **2018**, *358*, 181–188, doi:10.11646/phytotaxa.358.2.5.
41. Song, H.Y.; Zhong, P.A.; Liao, J.L.; Wang, Z.H.; Hu, D.M.; Huang, Y.J. *Junewangia aquatica* (Junewangiaceae), a new species from freshwater habitats in China. *Phytotaxa* **2018**, *336*, 272–278, doi:10.11646/phytotaxa.336.3.5.
42. Luo, Z.L.; Hyde, K.D.; Liu, J.K.; Bhat, D.J.; Bao, D.F.; Li, W.L.; Su, H.Y. Lignicolous freshwater fungi from China II: Novel *Distoseptispora* (Distoseptisporaceae) species from northwestern Yunnan Province and a suggested unified method for studying lignicolous freshwater fungi. *Mycosphere* **2018**, *9*, 444–461, doi:10.5943/mycosphere/9/3/2.
43. Yang, J.; Maharachchikumbura, S.S.N.; Liu, J.K.; Hyde, K.D.; Jones, E.B.G.; Al-Sadi, A.M.; Liu, Z.Y. *Pseudostanjehughesia aquitropica* gen. et sp. nov. and *Sporidesmium sensu lato* species from freshwater habitats. *Mycol. Prog.* **2018**, *17*, 591–616, doi:10.1007/s11557-017-1339-4.
44. Maharachchikumbura, S.S.N.; Luo, Z.L.; Su, H.Y.; Al-Sadi, A.M.; Cheewangkoon, R. Reticulascaceae hyphomycetes from submerged wood in Yunnan, China. *Phytotaxa* **2018**, *348*, 187–198, doi:10.11646/phytotaxa.348.3.2.
45. Huang, S.K.; Jeewon, R.; Hyde, K.D.; Bhat, D.J.; Wen, T.C. Novel taxa within Nectriaceae: *Cosmosporella* gen. nov. and *Aquanectria* sp. nov. from freshwater habitats in China. *Cryptog. Mycol.* **2018**, *39*, 169–192, doi:10.7872/crym/v39.iss2.2018.169.
46. Hu, D.M.; Wang, M.; Cai, L. Phylogenetic assessment and taxonomic revision of *Mariannaea*. *Mycol. Prog.* **2017**, *16*, 271–283, doi:10.1007/s11557-016-1252-2.
47. Luo, Z.L.; Hyde, K.D.; Bhat, D.J.; Jeewon, R.; Maharachchikumbura, S.S.N.; Bao, D.F.; Li, W.L.; Su, X.J.; Yang, X.Y.; Su, H.Y. Morphological and molecular taxonomy of novel species Pleurotheciaceae from freshwater habitats in Yunnan, China. *Mycol. Prog.* **2018**, *17*, 511–530, doi:10.1007/s11557-018-1377-6.
48. Lu, Y.Z.; Zhang, J.Y.; Lin, C.G.; Luo, Z.L.; Liu, J.K. *Pseudodactylaria fusiformis* sp. nov. from freshwater habitat in China. *Phytotaxa* **2020**, *446*, 95–102, doi:10.11646/phytotaxa.446.2.2.

49. Wu, B.; Tian, J.Q.; Wang, L.; Liu, J.K.; Hyde, K.D.; Sun, J.Z. *Apiosordaria hamata* sp. nov. from lake sediment in China. *Mycotaxon* **2016**, *131*, 847–857, doi:10.5248/131.847.
50. Liu, L.L.; Yang, J.; Liu, N.G.; Chen, Y.Y.; Gui, X.X.; Liu, Z.Y. *Sporidesmium guizhouense* sp. nov. (Sordariomycetes incertae sedis), a new species from a freshwater habitat in Guizhou Province, China. *Phytotaxa* **2019**, *422*, 144–156, doi:10.11646/phytotaxa.422.2.2.
51. Huang, S.K.; Jeewon, R.; Hyde, K.D.; Bhat, D.J.; Chomnunti, P.; Wen, T.C. Beta-tubulin and Actin gene phylogeny supports *Phaeoacremonium ovale* as a new species from freshwater habitats in China. *MycoKeys* **2018**, *41*, 1–15.
52. Huang, J.E.; Song, H.Y.; Huang, X.G.; Ma, J.; Hu, D.M. *Phaeomonilia aquatica* sp. nov., an aquatic hyphomycete from China. *Mycotaxon* **2018**, *132*, 919–923, doi:10.5248/132.919.
53. Huang, J.E.; Song, H.Y.; Ma, J.; Guan, G.X.; Hu, D.M. *Xylohyphopsis aquatica* sp. nov., a new aquatic hyphomycete from China. *Mycotaxon* **2016**, *131*, 391–394, doi:10.5248/131.391.
